# Supplementary material for: Cu atomic chains supported on β-borophene sheets for effective CO2electroreduction
Source: Royal Society of Chemistry journal article supplement (doi:10.1039/c8nr01855c), 2018-01-01
Supplement: c8nr01855c1.pdf [file c8nr01855c1.pdf]

**Cu atomic chains supported on  $\beta$ -Borophene sheets for effective CO<sub>2</sub>  
electroreduction**

Haoming Shen <sup>a</sup>, Yawei Li <sup>b</sup> and Qiang Sun <sup>\*ac</sup>

<sup>a</sup>*Department of Materials Science and Engineering, Peking University, Beijing 100871, China.*

<sup>b</sup>*Department of Chemical Engineering, The Pennsylvania State University, University Park 16801, United States.*

<sup>c</sup>*Center for Applied Physics and Technology, Peking University, Beijing 100871, China*

## 1. Computational Hydrogen Electrode (CHE) Model<sup>1</sup>

The chemical potential of the proton-electron pairs ( $H^+e^-$ ) can be related to the chemical potential of  $H_2$  by setting the reference potential as the reversible hydrogen electrode (RHE). In this case, at  $pH = 0$  in the electrolyte and 1 bar of  $H_2$  in the gas phase at 298.15 K, the reaction of eq (1) reaches equilibrium at an electrode potential of  $U = 0$ . Thus, the chemical potential of the proton-electron pairs ( $H^+e^-$ ) is equal to half the chemical potential of gaseous  $H_2$  at 0 V (vs. RHE). The effect of the applied bias  $U$  is considered in eq (2).

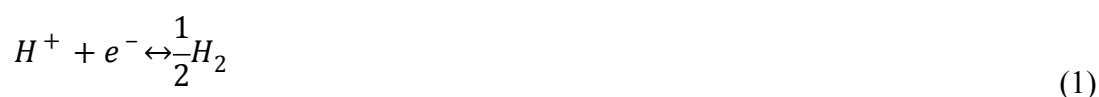

$$\mu(H^+) + \mu(e^-) = \frac{1}{2}\mu(H_{2(g)}) - eU \quad (2)$$

In order to get the accurate free energies of the elementary reactions, solvation corrections are included in the CHE model. The reactions are proceed in aqueous solution and the solvation corrections are well studied in previous works.<sup>2, 3</sup> Directly bound OH adsorbates are stabilized by 0.50 eV and indirectly bound OH containing adsorbates like COOH are stabilized by 0.25 eV. For CO or CHO containing adsorbates, the energy stabilization is 0.10 eV.

The Gibbs free energy differences ( $\Delta G$ ) for all electrocatalytic steps are defined as

$$\Delta G = \Delta E + \Delta E_{zpe} - T\Delta S + \Delta GpH \quad (3)$$

The entropy effects of these adsorbates are much less than those of the gas-phase species. The values of  $TS$  are close among the adsorbates and can be canceled out through free energy calculation. The entropy effects of the gas-phase species cannot be ignored. Therefore, we use the energies of thermodynamic experimental data as a reference and the energies are shown in Table S1 as well as the corrections.<sup>1,4</sup>

Table S1 Energy data and correction of small molecules. ( $p = 1$  bar)

|                                  | $E(\text{eV})$ | $E_{zpe}(\text{eV})$ | $TS(\text{eV})$ | $G(\text{eV})$ |
|----------------------------------|----------------|----------------------|-----------------|----------------|
| $\text{H}_2(\text{g})$           | -6.760         | 0.284                | 0.404           | -6.880         |
| $\text{H}_2\text{O}(\text{l})$   | -14.226        | 0.566                | 0.672(g)        | -14.332        |
| $\text{CO}(\text{g})$            | -14.799        | 0.133                | 0.611           | -15.277        |
| $\text{CO}_2(\text{g})$          | -22.993        | 0.304                | 0.661           | -23.350        |
| $\text{HCHO}(\text{g})$          | -22.144        | 0.731                | 0.676           | -22.089        |
| $\text{CH}_3\text{OH}(\text{l})$ | -30.217        | 1.391                | 0.741(g)        | -29.611        |
| $\text{CH}_4(\text{g})$          | -24.030        | 1.219                | 0.576           | -23.387        |

## 2. DOS of $\text{Cu}_1@B$ , $\text{Cu}_4@B$ and $\text{Cu}_\infty@B$

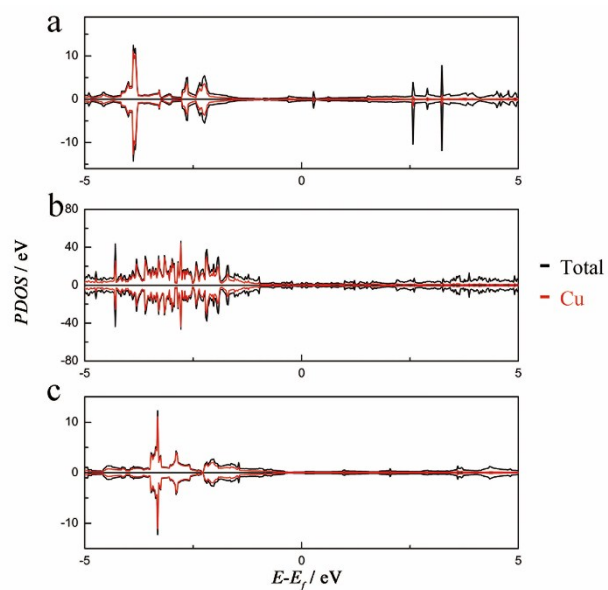

Figure. S1. Density of states for a)  $\text{Cu}_1@B$ , b)  $\text{Cu}_4@B$  and c)  $\text{Cu}_\infty@B$ . Total dos and Cu orbitals are denoted as black and red, respectively.

### 3. Adsorption Coverage Simulation on $\text{Cu}_\infty\text{@B}$

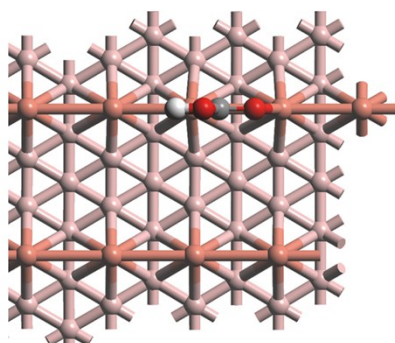

Fig. S2.  $\text{COOH}^*$  adsorbates on  $\text{Cu}_\infty\text{@B}$  at different coverage. a) 100% coverage, b) 50% coverage with interlaced adsorptions, c) 12.5% coverage with interlaced adsorptions.

Table S2 Overpotential of  $\text{COOH}^*$  Adsorption Elementary Step at Different Coverage.

| Coverage | Interlaced Adsorption | $E(\text{eV})$ |
|----------|-----------------------|----------------|
| 100 %    | N                     | 0.795          |
| 50 %     | N                     | 0.207          |
| 33.3 %   | N                     | 0.184          |
| 25 %     | N                     | 0.180          |
| 50 %     | Y                     | 0.143          |

#### 4. Structure Optimization of CHO\* and CO\* Adsorbates

Table S3 Structure properties of CHO\* intermediates

|           | Cu <sub>1</sub> @B | Cu <sub>2</sub> @B | Cu <sub>3</sub> @B | Cu <sub>4</sub> @B | Cu <sub>5</sub> @B | Cu <sub>6</sub> @B | Cu <sub>∞</sub> @B |
|-----------|--------------------|--------------------|--------------------|--------------------|--------------------|--------------------|--------------------|
| d(c-m) /Å | 1.944              | 1.924              | 1.919              | 1.917              | 1.918              | 1.918              | 1.917              |
| d(c=o) /Å | 1.214              | 1.263              | 1.264              | 1.266              | 1.264              | 1.264              | 1.266              |
| d(m-o) /Å |                    | 2.002              | 1.980              | 1.982              | 1.980              | 1.979              | 1.975              |

Table S4 Structure properties of CO intermediates

|           | Cu <sub>1</sub> @B | Cu <sub>2</sub> @B | Cu <sub>3</sub> @B | Cu <sub>4</sub> @B | Cu <sub>5</sub> @B | Cu <sub>6</sub> @B | Cu <sub>∞</sub> @B |
|-----------|--------------------|--------------------|--------------------|--------------------|--------------------|--------------------|--------------------|
| d(c-m) /Å | 1.817              | 1.817              | 1.810              | 1.811              | 1.810              | 1.812              | 1.809              |
| d(c=o) /Å | 1.159              | 1.159              | 1.160              | 1.159              | 1.159              | 1.158              | 1.157              |



## References

1. A. A. Peterson, F. Abild-Pedersen, F. Studt, J. Rossmeisl and J. K. Nørskov, *Energy & Environmental Science*, 2010, **3**, 1311-1315.
2. J. K. Nørskov, J. Rossmeisl, A. Logadottir, L. Lindqvist, J. R. Kitchin, T. Bligaard and H. Jonsson, *The Journal of Physical Chemistry B*, 2004, **108**, 17886-17892.
3. F. Calle - Vallejo and M. Koper, *Angewandte Chemie International Edition*, 2013, **52**, 7282-7285.
4. D. R. Lide, *CRC handbook of chemistry and physics*, CRC press, 2004.
